# Supplementary material for: The effect of leadership on public service motivation: a multiple embedded case study in Morocco
Source: PubMed Central journal article supplement — BMJ Open. 2020 Jan 2;10(1):e033010. doi: 10.1136/bmjopen-2019-033010 (PMC6955481; doi:10.1136/bmjopen-2019-033010), 2020-01-02
Supplement: bmjopen-2019-033010supp003.pdf [file bmjopen-2019-033010supp003.pdf]

**Table 1 frequency of leadership styles themes**

|                             | EJMH | NHMH | RKMH | SMBA |
|-----------------------------|------|------|------|------|
| Laisser-faire Leadership    | 33   | 24   | 91   | 87   |
| Transactional leadership    | 173  | 135  | 95   | 82   |
| Transformational leadership | 94   | 128  | 52   | 80   |
| Distributed leadership      | 18   | 39   | 1    | 15   |
| Complex leadership          | 142  | 221  | 40   | 94   |

**Table 2 frequency of Leadership-PSM causal codes**

| PSM /leadership styles      | Attraction to public service | Commitment to public values | Compassion | Self-Sacrifice |
|-----------------------------|------------------------------|-----------------------------|------------|----------------|
| Laisser-faire leadership    | 2                            | 12                          | 21         | 5              |
| Transactional leadership    | 12                           | 20                          | 4          | 4              |
| Distributed leadership      | 2                            | 0                           | 0          | 0              |
| Transformational leadership | 20                           | 16                          | 16         | 8              |
| Complex leadership          | 19                           | 14                          | 6          | 11             |

**Table 3 Organisational characteristics (culture and climate) subthemes**

|                                        | EJMH | NHMH | RKMH | SMBA |
|----------------------------------------|------|------|------|------|
| Market Culture                         | 3    | 0    | 6    | 3    |
| Pigeonholing                           | 10   | 15   | 24   | 66   |
| Hierarchical Culture                   | 18   | 5    | 31   | 24   |
| Conflict and ambiguity;                | 52   | 29   | 47   | 98   |
| Job challenge, importance and variety  | 7    | 9    | 6    | 11   |
| Perceived supervisor support           | 20   | 13   | 15   | 33   |
| Professional and organisational esprit | 104  | 138  | 94   | 46   |
| Clan culture                           | 42   | 74   | 28   | 60   |
| Culture of integrity                   | 9    | 28   | 0    | 3    |
| Perceived organisational politics      | 27   | 19   | 36   | 24   |

**Table 4 Individual motivation subthemes**

| Type of motivation        | EJMH | NHMH | RKMH | SMBA |
|---------------------------|------|------|------|------|
| Amotivation               | 30   | 4    | 11   | 1    |
| Extrinsic motivation      | 23   | 35   | 15   | 21   |
| Intrinsic motivation      | 6    | 26   | 0    | 3    |
| Public Service Motivation | 171  | 241  | 237  | 326  |

**Table 5 Basic Psychological needs subthemes**

| Psychological needs/site | EJMH | NHMH | RKMH | SMBA |
|--------------------------|------|------|------|------|
| Competency needs         | 8    | 25   | 20   | 12   |
| Autonomy needs           | 6    | 4    | 2    | 3    |
| Relatedness needs        | 17   | 4    | 15   | 15   |
